# Supplementary material for: Scandinavian Forest Fire Activity Correlates with Proxies of the Baffin Bay Ice Cover
Source: MDPI journal article supplement (doi:10.3390/f13010060), 2022-01-04
Supplement: s1 [file s1]

Archive with 1 entries (1 files):
- forests-1497802-supplementary.pdf
