# Supplementary material for: Scandinavian Forest Fire Activity Correlates with Proxies of the Baffin Bay Ice Cover
Source: MDPI journal article supplement (doi:10.3390/f13010060), 2022-01-04
Supplement: s1 [file s1 › forests-1497802-supplementary.pdf]

## Supplementary Information

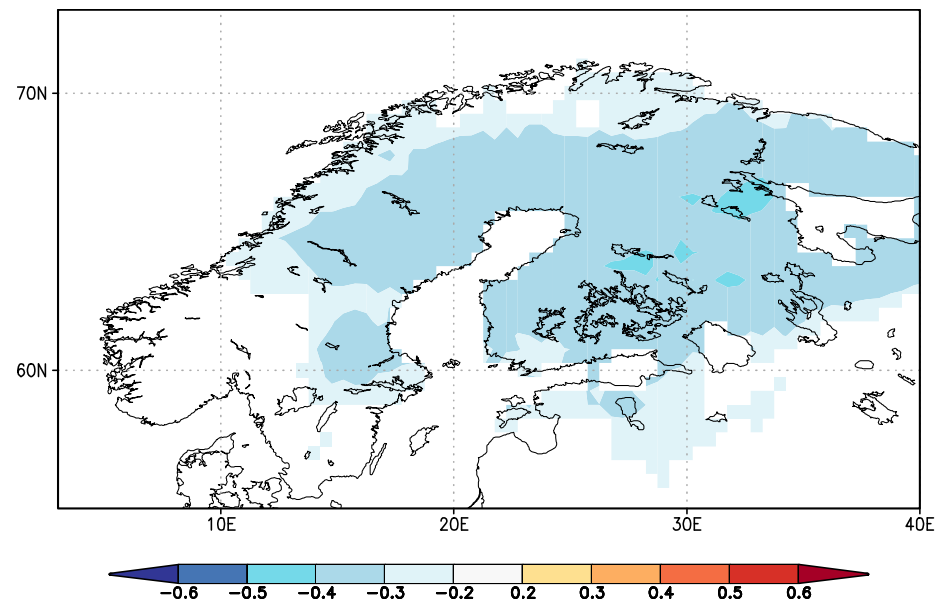

**Figure S1.** Field correlation between detrended fire record over Northern Sweden and Norway and 3-month SPEI over May-July. The field significance is <0.1%.
